# Supplementary material for: Comprehensive evolutionary analysis of the TCP gene family: Further insights for its origin, expansion, and diversification
Source: PubMed Central journal article supplement (PMC9480096; doi:10.3389/fpls.2022.994567), 2022-09-02
Supplement: Data_Sheet_1.pdf [file Data_Sheet_1.pdf]

## Supplementary Material

### Supplementary Figures

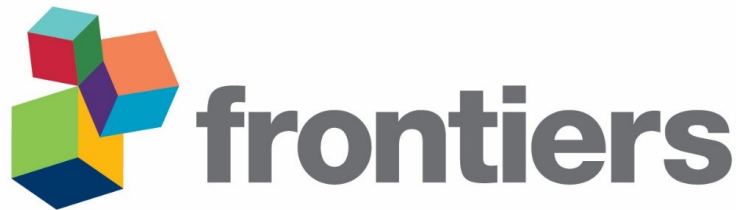

**Supplementary Figure 1.** Phylogenetic tree of *TCP* genes in angiosperms constructed based on the amino acid sequences of the TCP domain and its upstream and downstream conserved regions. The tree was not rooted. Branch lengths indicate the number of amino acid residues substitutions per site and are drawn to scale. Numbers associated with nodes are UFBoot support values and posterior probability in the phylogeny analysis based on amino acid sequences (first and second) and coding sequences (CDS) (third and fourth) of the domain, respectively. All species abbreviations are listed in Supplementary Table 1.

**Supplementary Figure 2.** Phylogenetic tree of *TCP* genes in gymnosperms constructed based on the amino acid sequences of the TCP domain and its upstream and downstream conserved regions. The tree was not rooted. Branch lengths indicate the number of amino acid residues substitutions per site and are drawn to scale. Numbers associated with nodes are UFBoot support values and posterior probability in the phylogeny analysis based on amino acid sequences (first and second) and CDS (third and fourth) of the domain, respectively. All species abbreviations are listed in Supplementary Table 1.

**Supplementary Figure 3.** Phylogenetic tree of *TCP* genes in ferns constructed based on the amino acid sequences of the TCP domain and its upstream and downstream conserved regions. The tree was not rooted. Branch lengths indicate the number of amino acid residues substitutions per site and are drawn to scale. Numbers associated with nodes are UFBoot support values and posterior probability in the phylogeny analysis based on amino acid sequences (first and second) and CDS (third and fourth) of the domain, respectively. All species abbreviations are listed in Supplementary Table 1.

**Supplementary Figure 4.** Sequence logos of the conserved sequences of Class II *TCP* genes. Bit scores represent the relative frequency of amino acids. The black circle represents conserved loci within the whole family. The red triangle indicates the distinct residues between CYC subclade and other three subclades.

**Supplementary Figure 5.** Expression profiles of *TCP* genes in *Arabidopsis thaliana* (A) and *Picea abies* (B). The expression data was retrieved from Arabidopsis RNA-seq database (<http://ipf.sustech.edu.cn/pub/athrna/>) and Plantgenie database (<https://plantgenie.org/>). No

expression data was detected for *PabTCP4* (Class II-B), *PabTCP6* (Class II-A) and *PabTCP10* (Class II-A).

## Supplementary Tables

**Supplementary Table 1.** The detailed information of candidate *TCP* genes identified in this study.

| Group            | Species            | Code                               | Classification | Gene                               | Duplication      | Database*<br>or reference |                  |
|------------------|--------------------|------------------------------------|----------------|------------------------------------|------------------|---------------------------|------------------|
| Angiosperms      | <i>Arabidopsis</i> | AtTCP1/CYC/TB1                     | Class II-C     | At1g67260                          | Dispersed        | Liu et al., 2019          |                  |
|                  |                    | <i>thaliana</i>                    | AtTCP2         | Class II-B                         | At4g18390        | WGD or Segmental          | Liu et al., 2019 |
|                  |                    | AtTCP3                             | Class II-A     | At1g53230                          | Dispersed        | Liu et al., 2019          |                  |
|                  |                    | AtTCP4/MEE35                       | Class II-A     | At3g15030                          | Singleton        | Liu et al., 2019          |                  |
|                  |                    | AtTCP5                             | Class II-B     | At5g60970                          | WGD or Segmental | Liu et al., 2019          |                  |
|                  |                    | AtTCP6                             | Class I        | At5g41030                          | Dispersed        | Liu et al., 2019          |                  |
|                  |                    | AtTCP7                             | Class I        | At5g23280                          | WGD or Segmental | Liu et al., 2019          |                  |
|                  |                    | AtTCP8                             | Class I        | At1g58100                          | Dispersed        | Liu et al., 2019          |                  |
|                  |                    | AtTCP9                             | Class I        | At2g45680                          | Dispersed        | Liu et al., 2019          |                  |
|                  |                    | AtTCP10                            | Class II-A     | At2g31070                          | Dispersed        | Liu et al., 2019          |                  |
|                  |                    | AtTCP11                            | Class I        | At2g37000                          | Dispersed        | Liu et al., 2019          |                  |
|                  |                    | AtTCP12/BRC2                       | Class II-C     | At1g68800                          | Singleton        | Liu et al., 2019          |                  |
|                  |                    | AtTCP13/PTF1                       | Class II-B     | At3g02150                          | Dispersed        | Liu et al., 2019          |                  |
|                  |                    | AtTCP14                            | Class I        | At3g47620                          | Dispersed        | Liu et al., 2019          |                  |
|                  |                    | AtTCP15                            | Class I        | At1g69690                          | Dispersed        | Liu et al., 2019          |                  |
|                  |                    | AtTCP16                            | Class I        | At3g45150                          | Dispersed        | Liu et al., 2019          |                  |
|                  | AtTCP17            | Class II-B                         | At5g08070      | WGD or Segmental                   | Liu et al., 2019 |                           |                  |
|                  | AtTCP18/BRC1       | Class II-C                         | At3g18550      | Singleton                          | Liu et al., 2019 |                           |                  |
|                  | AtTCP19            | Class I                            | At5g51910      | Dispersed                          | Liu et al., 2019 |                           |                  |
|                  | AtTCP20            | Class I                            | At3g27010      | Singleton                          | Liu et al., 2019 |                           |                  |
|                  | AtTCP21/CHE        | Class I                            | At5g08330      | WGD or Segmental                   | Liu et al., 2019 |                           |                  |
|                  | AtTCP22            | Class I                            | At1g72010      | Dispersed                          | Liu et al., 2019 |                           |                  |
|                  | AtTCP23            | Class I                            | At1g35560      | Dispersed                          | Liu et al., 2019 |                           |                  |
|                  | AtTCP24            | Class II-B                         | At1g30210      | WGD or Segmental                   | Liu et al., 2019 |                           |                  |
| <i>Amborella</i> | <i>trichopoda</i>  | AtrTCP1                            | Class II-A     | evm_27.model.AmTr_v1.0_scaffold000 |                  | Liu et al., 2019          |                  |
|                  |                    | AtrTCP2                            | Class I        | evm_27.model.AmTr_v1.0_scaffold000 |                  | Liu et al., 2019          |                  |
|                  |                    | AtrTCP3                            | Class I        | evm_27.model.AmTr_v1.0_scaffold000 |                  | Liu et al., 2019          |                  |
|                  |                    | AtrTCP4                            | Class I        | evm_27.model.AmTr_v1.0_scaffold000 |                  | Liu et al., 2019          |                  |
|                  |                    | AtrTCP5                            | Class I        | evm_27.model.AmTr_v1.0_scaffold000 |                  | Liu et al., 2019          |                  |
| AtrTCP6          | Class II-A         | evm_27.model.AmTr_v1.0_scaffold000 |                | Liu et al., 2019                   |                  |                           |                  |
| AtrTCP7          | Class I            | evm_27.model.AmTr_v1.0_scaffold000 |                | Liu et al., 2019                   |                  |                           |                  |
| AtrTCP8          | Class II-A         | evm_27.model.AmTr_v1.0_scaffold000 |                | Liu et al., 2019                   |                  |                           |                  |
| AtrTCP9          | Class I            | evm_27.model.AmTr_v1.0_scaffold000 |                | Liu et al., 2019                   |                  |                           |                  |

|                   |          |            |                                    |                  |
|-------------------|----------|------------|------------------------------------|------------------|
|                   | AtrTCP10 | Class II-B | evm_27.model.AmTr_v1.0_scaffold000 | Liu et al., 2019 |
|                   | AtrTCP11 | Class II-A | evm_27.model.AmTr_v1.0_scaffold001 | Liu et al., 2019 |
|                   | AtrTCP12 | Class II-A | evm_27.model.AmTr_v1.0_scaffold001 | Liu et al., 2019 |
|                   | AtrTCP13 | Class II-B | evm_27.model.AmTr_v1.0_scaffold001 | Liu et al., 2019 |
| <i>Ananas</i>     | AcomTCP1 | Class II-B | Aco002292.1                        | Liu et al., 2019 |
| <i>comosus</i>    | AcomTCP2 | Class II-C | Aco003020.1                        | Liu et al., 2019 |
|                   | AcomTCP3 | Class I    | Aco006659.1                        | Liu et al., 2019 |
|                   | AcomTCP4 | Class I    | Aco010326.1                        | Liu et al., 2019 |
|                   | AcomTCP5 | Class II-A | Aco010666.1                        | Liu et al., 2019 |
|                   | AcomTCP6 | Class II-B | Aco012417.1                        | Liu et al., 2019 |
|                   | AcomTCP7 | Class I    | Aco015741.1                        | Liu et al., 2019 |
|                   | AcomTCP8 | Class I    | Aco021664.1                        | Liu et al., 2019 |
|                   | AcomTCP9 | Class II-C | Aco024489.1                        | Liu et al., 2019 |
| <i>Aquilegia</i>  | AcoTCP1  | Class I    | Aqcoe1G137200.1                    | Liu et al., 2019 |
| <i>coerulea</i>   | AcoTCP2  | Class II-A | Aqcoe1G240000.1                    | Liu et al., 2019 |
|                   | AcoTCP3  | Class I    | Aqcoe3G008000.1                    | Liu et al., 2019 |
|                   | AcoTCP4  | Class II-C | Aqcoe3G048600.1                    | Liu et al., 2019 |
|                   | AcoTCP5  | Class I    | Aqcoe3G081500.1                    | Liu et al., 2019 |
|                   | AcoTCP6  | Class I    | Aqcoe3G164300.1                    | Liu et al., 2019 |
|                   | AcoTCP7  | Class I    | Aqcoe3G335300.1                    | Liu et al., 2019 |
|                   | AcoTCP8  | Class II-B | Aqcoe3G370100.1                    | Liu et al., 2019 |
|                   | AcoTCP9  | Class II-C | Aqcoe3G395500.1                    | Liu et al., 2019 |
|                   | AcoTCP10 | Class II-B | Aqcoe4G007100.1                    | Liu et al., 2019 |
|                   | AcoTCP11 | Class I    | Aqcoe5G347900.1                    | Liu et al., 2019 |
|                   | AcoTCP12 | Class I    | Aqcoe5G422600.1                    | Liu et al., 2019 |
|                   | AcoTCP13 | Class I    | Aqcoe6G015800.1                    | Liu et al., 2019 |
|                   | AcoTCP14 | Class I    | Aqcoe7G051800.1                    | Liu et al., 2019 |
| <i>Eucalyptus</i> | EgrTCP1  | Class I    | Euegr.A01143.1                     | Liu et al., 2019 |
| <i>grandis</i>    | EgrTCP2  | Class I    | Euegr.A02843.1                     | Liu et al., 2019 |
|                   | EgrTCP3  | Class I    | Euegr.B00471.1                     | Liu et al., 2019 |
|                   | EgrTCP4  | Class II-B | Euegr.B00608.1                     | Liu et al., 2019 |
|                   | EgrTCP5  | Class II-C | Euegr.B00699.1                     | Liu et al., 2019 |
|                   | EgrTCP6  | Class I    | Euegr.B03427.1                     | Liu et al., 2019 |
|                   | EgrTCP7  | Class I    | Euegr.B03529.1                     | Liu et al., 2019 |
|                   | EgrTCP8  | Class I    | Euegr.D02422.1                     | Liu et al., 2019 |
|                   | EgrTCP9  | Class II-A | Euegr.F01204.1                     | Liu et al., 2019 |
|                   | EgrTCP10 | Class I    | Euegr.F02587.1                     | Liu et al., 2019 |
|                   | EgrTCP11 | Class II-C | Euegr.G02354.1                     | Liu et al., 2019 |
|                   | EgrTCP12 | Class II-B | Euegr.I02038.1                     | Liu et al., 2019 |
|                   | EgrTCP13 | Class II-C | Euegr.J01466.1                     | Liu et al., 2019 |
|                   | EgrTCP14 | Class II-A | Euegr.K01089.1                     | Liu et al., 2019 |
|                   | EgrTCP15 | Class II-B | Euegr.K02535.1                     | Liu et al., 2019 |
|                   | EgrTCP16 | Class II-C | Euegr.K02654.1                     | Liu et al., 2019 |
| <i>Glycine</i>    | GmaTCP1  | Class I    | Glyma.01G045500.1                  | Liu et al., 2019 |
| <i>max</i>        | GmaTCP2  | Class I    | Glyma.02G105900.1                  | Liu et al., 2019 |
|                   | GmaTCP3  | Class I    | Glyma.03G018800.1                  | Liu et al., 2019 |
|                   | GmaTCP4  | Class II-C | Glyma.04G152400.1                  | Liu et al., 2019 |

## Supplementary Material

|          |            |                   |                  |
|----------|------------|-------------------|------------------|
| GmaTCP5  | Class II-B | Glyma.04G161400.1 | Liu et al., 2019 |
| GmaTCP6  | Class I    | Glyma.04G170600.1 | Liu et al., 2019 |
| GmaTCP7  | Class II-C | Glyma.05G013300.1 | Liu et al., 2019 |
| GmaTCP8  | Class II-B | Glyma.05G019900.1 | Liu et al., 2019 |
| GmaTCP9  | Class I    | Glyma.05G027400.1 | Liu et al., 2019 |
| GmaTCP10 | Class I    | Glyma.05G050400.1 | Liu et al., 2019 |
| GmaTCP11 | Class II-B | Glyma.05G142000.1 | Liu et al., 2019 |
| GmaTCP12 | Class I    | Glyma.06G193000.1 | Liu et al., 2019 |
| GmaTCP13 | Class II-B | Glyma.06G204300.1 | Liu et al., 2019 |
| GmaTCP14 | Class II-C | Glyma.06G210600.1 | Liu et al., 2019 |
| GmaTCP15 | Class II-A | Glyma.06G232300.1 | Liu et al., 2019 |
| GmaTCP16 | Class II-A | Glyma.06G284500.1 | Liu et al., 2019 |
| GmaTCP17 | Class I    | Glyma.07G080300.1 | Liu et al., 2019 |
| GmaTCP18 | Class II-B | Glyma.08G097900.1 | Liu et al., 2019 |
| GmaTCP19 | Class II-B | Glyma.08G247300.1 | Liu et al., 2019 |
| GmaTCP20 | Class II-C | Glyma.08G256400.1 | Liu et al., 2019 |
| GmaTCP21 | Class I    | Glyma.08G299400.1 | Liu et al., 2019 |
| GmaTCP22 | Class I    | Glyma.09G284300.1 | Liu et al., 2019 |
| GmaTCP23 | Class I    | Glyma.09G284500.1 | Liu et al., 2019 |
| GmaTCP24 | Class I    | Glyma.10G057400.1 | Liu et al., 2019 |
| GmaTCP25 | Class I    | Glyma.10G240200.1 | Liu et al., 2019 |
| GmaTCP26 | Class II-C | Glyma.10G246200.1 | Liu et al., 2019 |
| GmaTCP27 | Class I    | Glyma.10G285900.1 | Liu et al., 2019 |
| GmaTCP28 | Class I    | Glyma.11G196000.1 | Liu et al., 2019 |
| GmaTCP29 | Class II-A | Glyma.12G121500.1 | Liu et al., 2019 |
| GmaTCP30 | Class II-A | Glyma.12G158900.1 | Liu et al., 2019 |
| GmaTCP31 | Class I    | Glyma.12G168300.1 | Liu et al., 2019 |
| GmaTCP32 | Class II-A | Glyma.12G208800.1 | Liu et al., 2019 |
| GmaTCP33 | Class II-A | Glyma.12G228300.1 | Liu et al., 2019 |
| GmaTCP34 | Class II-C | Glyma.13G047400.1 | Liu et al., 2019 |
| GmaTCP35 | Class I    | Glyma.13G144100.1 | Liu et al., 2019 |
| GmaTCP36 | Class II-B | Glyma.13G219900.1 | Liu et al., 2019 |
| GmaTCP37 | Class II-A | Glyma.13G271700.1 | Liu et al., 2019 |
| GmaTCP38 | Class II-A | Glyma.13G292500.1 | Liu et al., 2019 |
| GmaTCP39 | Class II-B | Glyma.15G092500.1 | Liu et al., 2019 |
| GmaTCP40 | Class I    | Glyma.16G004300.1 | Liu et al., 2019 |
| GmaTCP41 | Class I    | Glyma.16G053900.1 | Liu et al., 2019 |
| GmaTCP42 | Class II-B | Glyma.17G079900.1 | Liu et al., 2019 |
| GmaTCP43 | Class I    | Glyma.17G099100.1 | Liu et al., 2019 |
| GmaTCP44 | Class II-C | Glyma.17G121500.1 | Liu et al., 2019 |
| GmaTCP45 | Class I    | Glyma.17G132400.1 | Liu et al., 2019 |
| GmaTCP46 | Class I    | Glyma.18G121400.1 | Liu et al., 2019 |
| GmaTCP47 | Class II-B | Glyma.18G268700.1 | Liu et al., 2019 |
| GmaTCP48 | Class II-C | Glyma.18G280700.1 | Liu et al., 2019 |
| GmaTCP49 | Class II-B | Glyma.19G030900.1 | Liu et al., 2019 |
| GmaTCP50 | Class II-C | Glyma.19G044400.1 | Liu et al., 2019 |

|                    |          |            |                                           |                  |                  |
|--------------------|----------|------------|-------------------------------------------|------------------|------------------|
|                    | GmaTCP51 | Class I    | Glyma.19G095300.1                         |                  | Liu et al., 2019 |
|                    | GmaTCP52 | Class I    | Glyma.20G001600.1                         |                  | Liu et al., 2019 |
|                    | GmaTCP53 | Class I    | Glyma.20G103400.1                         |                  | Liu et al., 2019 |
|                    | GmaTCP54 | Class II-C | Glyma.20G148500.1                         |                  | Liu et al., 2019 |
|                    | GmaTCP55 | Class I    | Glyma.20G154400.1                         |                  | Liu et al., 2019 |
| <i>Oryza</i>       | OsTCP1   | Class II-A | LOC_Os01g11550.1                          | WGD or Segmental | Liu et al., 2019 |
| <i>sativa</i>      | OsTCP2   | Class II-B | LOC_Os01g55750.1                          | WGD or Segmental | Liu et al., 2019 |
|                    | OsTCP3   | Class I    | LOC_Os01g69980.1                          | Dispersed        | Liu et al., 2019 |
|                    | OsTCP4   | Class I    | LOC_Os02g42380.1                          | WGD or Segmental | Liu et al., 2019 |
|                    | OsTCP5   | Class I    | LOC_Os02g51280.1                          | WGD or Segmental | Liu et al., 2019 |
|                    | OsTCP6   | Class II-B | LOC_Os02g51310.1                          | Dispersed        | Liu et al., 2019 |
|                    | OsTCP7   | Class II-C | LOC_Os03g49880.1                          | Dispersed        | Liu et al., 2019 |
|                    | OsTCP8   | Class II-B | LOC_Os03g57190.1                          | WGD or Segmental | Liu et al., 2019 |
|                    | OsTCP9   | Class I    | LOC_Os04g11830.1                          | Dispersed        | Liu et al., 2019 |
|                    | OsTCP10  | Class I    | LOC_Os04g44440.1                          | WGD or Segmental | Liu et al., 2019 |
|                    | OsTCP11  | Class II-B | LOC_Os05g43760.1                          | WGD or Segmental | Liu et al., 2019 |
|                    | OsTCP12  | Class I    | LOC_Os06g12230.1                          | WGD or Segmental | Liu et al., 2019 |
|                    | OsTCP13  | Class II-B | LOC_Os07g05720.1                          | WGD or Segmental | Liu et al., 2019 |
|                    | OsTCP14  | Class II-C | LOC_Os08g33530.1                          | WGD or Segmental | Liu et al., 2019 |
|                    | OsTCP15  | Class I    | LOC_Os08g43160.1                          | WGD or Segmental | Liu et al., 2019 |
|                    | OsTCP16  | Class II-C | LOC_Os09g24480.1                          | WGD or Segmental | Liu et al., 2019 |
|                    | OsTCP17  | Class I    | LOC_Os09g34950.1                          | WGD or Segmental | Liu et al., 2019 |
|                    | OsTCP18  | Class I    | LOC_Os11g07460.1                          | WGD or Segmental | Liu et al., 2019 |
|                    | OsTCP19  | Class II-B | LOC_Os12g02090.1                          | Dispersed        | Liu et al., 2019 |
|                    | OsTCP20  | Class I    | LOC_Os12g07480.1                          | WGD or Segmental | Liu et al., 2019 |
|                    | OsTCP21  | Class II-B | LOC_Os12g42190.1                          | Dispersed        | Liu et al., 2019 |
| <i>Populus</i>     | PtTCP1   | Class I    | Potri.001G060000.1                        |                  | Liu et al., 2019 |
| <i>trichocarpa</i> | PtTCP2   | Class I    | Potri.001G111800.1                        |                  | Liu et al., 2019 |
|                    | PtTCP3   | Class I    | Potri.001G327100.1                        |                  | Liu et al., 2019 |
|                    | PtTCP4   | Class II-A | Potri.001G375800.1                        |                  | Liu et al., 2019 |
|                    | PtTCP5   | Class I    | Potri.002G152200.1                        |                  | Liu et al., 2019 |
|                    | PtTCP6   | Class I    | Potri.003G120200.1                        |                  | Liu et al., 2019 |
|                    | PtTCP7   | Class I    | Potri.003G167900.1                        |                  | Liu et al., 2019 |
|                    | PtTCP8   | Class I    | Potri.004G046300.1                        |                  | Liu et al., 2019 |
|                    | PtTCP9   | Class II-B | Potri.004G065800.1                        |                  | Liu et al., 2019 |
|                    | PtTCP10  | Class II-B | Potri.004G116100.1;<br>Potri.T146100.1    |                  | Liu et al., 2019 |
|                    | PtTCP11  | Class I    | Potri.004G222100.1                        |                  | Liu et al., 2019 |
|                    | PtTCP12  | Class I    | Potri.005G090300.1                        |                  | Liu et al., 2019 |
|                    | PtTCP13  | Class I    | Potri.006G125800.1;<br>Potri.005G140600.1 |                  | Liu et al., 2019 |
|                    | PtTCP14  | Class II-C | Potri.008G115800.1                        |                  | Liu et al., 2019 |
|                    | PtTCP15  | Class I    | Potri.009G009400.1                        |                  | Liu et al., 2019 |
|                    | PtTCP16  | Class II-C | Potri.010G130200.1                        |                  | Liu et al., 2019 |
|                    | PtTCP17  | Class I    | Potri.011G055500.1                        |                  | Liu et al., 2019 |
|                    | PtTCP18  | Class II-B | Potri.011G083100.1                        |                  | Liu et al., 2019 |
|                    | PtTCP19  | Class II-A | Potri.011G096600.1                        |                  | Liu et al., 2019 |

## Supplementary Material

|                     |          |            |                                           |                  |
|---------------------|----------|------------|-------------------------------------------|------------------|
|                     | PtTCP20  | Class II-C | Potri.012G059900.1                        | Liu et al., 2019 |
|                     | PtTCP21  | Class I    | Potri.012G135900.1                        | Liu et al., 2019 |
|                     | PtTCP22  | Class I    | Potri.013G110700.1                        | Liu et al., 2019 |
|                     | PtTCP23  | Class II-A | Potri.013G119400.1                        | Liu et al., 2019 |
|                     | PtTCP24  | Class I    | Potri.014G078500.1                        | Liu et al., 2019 |
|                     | PtTCP25  | Class II-C | Potri.015G050500.1                        | Liu et al., 2019 |
|                     | PtTCP26  | Class II-B | Potri.015G058800.1                        | Liu et al., 2019 |
|                     | PtTCP27  | Class I    | Potri.015G138200.1                        | Liu et al., 2019 |
|                     | PtTCP28  | Class I    | Potri.016G094800.1                        | Liu et al., 2019 |
|                     | PtTCP29  | Class II-B | Potri.017G094800.1;<br>Potri.016G074200.1 | Liu et al., 2019 |
|                     | PtTCP30  | Class II-C | Potri.017G112000.1                        | Liu et al., 2019 |
|                     | PtTCP31  | Class I    | Potri.019G081800.1                        | Liu et al., 2019 |
|                     | PtTCP32  | Class II-A | Potri.019G091300.1                        | Liu et al., 2019 |
|                     | PtTCP33  | Class I    | Potri.T044100.1                           | Liu et al., 2019 |
| <i>Solanum</i>      | SlyTCP1  | Class I    | Solyc00g084870.2.1                        | Liu et al., 2019 |
| <i>lycopersicum</i> | SlyTCP2  | Class II-B | Solyc00g217560.1.1                        | Liu et al., 2019 |
|                     | SlyTCP3  | Class I    | Solyc01g008230.2.1                        | Liu et al., 2019 |
|                     | SlyTCP4  | Class I    | Solyc01g103780.2.1                        | Liu et al., 2019 |
|                     | SlyTCP5  | Class II-B | Solyc02g065800.1.1                        | Liu et al., 2019 |
|                     | SlyTCP6  | Class I    | Solyc02g068200.1.1                        | Liu et al., 2019 |
|                     | SlyTCP7  | Class II-A | Solyc02g077250.2.1                        | Liu et al., 2019 |
|                     | SlyTCP8  | Class II-B | Solyc02g089020.1.1                        | Liu et al., 2019 |
|                     | SlyTCP9  | Class II-C | Solyc02g089830.1.1                        | Liu et al., 2019 |
|                     | SlyTCP10 | Class I    | Solyc02g094290.1.1                        | Liu et al., 2019 |
|                     | SlyTCP11 | Class I    | Solyc03g006800.1.1                        | Liu et al., 2019 |
|                     | SlyTCP12 | Class II-C | Solyc03g045030.1.1                        | Liu et al., 2019 |
|                     | SlyTCP13 | Class II-B | Solyc03g115010.1.1                        | Liu et al., 2019 |
|                     | SlyTCP14 | Class I    | Solyc03g116320.2.1                        | Liu et al., 2019 |
|                     | SlyTCP15 | Class II-C | Solyc03g119770.2.1                        | Liu et al., 2019 |
|                     | SlyTCP16 | Class II-C | Solyc04g006980.1.1                        | Liu et al., 2019 |
|                     | SlyTCP17 | Class I    | Solyc04g009180.1.1                        | Liu et al., 2019 |
|                     | SlyTCP18 | Class I    | Solyc05g007420.1.1                        | Liu et al., 2019 |
|                     | SlyTCP19 | Class II-C | Solyc05g009900.1.1                        | Liu et al., 2019 |
|                     | SlyTCP20 | Class II-A | Solyc05g012840.1.1                        | Liu et al., 2019 |
|                     | SlyTCP21 | Class II-A | Solyc05g032780.1.1                        | Liu et al., 2019 |
|                     | SlyTCP22 | Class I    | Solyc06g065190.1.1                        | Liu et al., 2019 |
|                     | SlyTCP23 | Class II-C | Solyc06g069240.1.1                        | Liu et al., 2019 |
|                     | SlyTCP24 | Class II-B | Solyc06g069460.1.1                        | Liu et al., 2019 |
|                     | SlyTCP25 | Class I    | Solyc06g070900.2.1                        | Liu et al., 2019 |
|                     | SlyTCP26 | Class II-A | Solyc07g053410.2.1                        | Liu et al., 2019 |
|                     | SlyTCP27 | Class II-A | Solyc07g062680.1.1                        | Liu et al., 2019 |
|                     | SlyTCP28 | Class II-B | Solyc08g048370.2.1                        | Liu et al., 2019 |
|                     | SlyTCP29 | Class II-B | Solyc08g048390.1.1                        | Liu et al., 2019 |
|                     | SlyTCP30 | Class I    | Solyc08g080150.1.1                        | Liu et al., 2019 |
|                     | SlyTCP31 | Class I    | Solyc09g008030.1.1                        | Liu et al., 2019 |

|                    |                     |           |            |                           |                  |
|--------------------|---------------------|-----------|------------|---------------------------|------------------|
|                    |                     | SlyTCP32  | Class II-A | Solyc10g008780.1.1        | Liu et al., 2019 |
|                    |                     | SlyTCP33  | Class II-A | Solyc10g018710.1.1        | Liu et al., 2019 |
|                    |                     | SlyTCP34  | Class I    | Solyc11g020670.1.1        | Liu et al., 2019 |
|                    |                     | SlyTCP35  | Class II-A | Solyc11g045640.1.1        | Liu et al., 2019 |
|                    |                     | SlyTCP36  | Class II-A | Solyc12g014140.1.1        | Liu et al., 2019 |
|                    | <i>Zostera</i>      | ZmaTCP1   | Class I    | Zosma10g00260.1           | Liu et al., 2019 |
|                    | <i>marina</i>       | ZmaTCP2   | Class I    | Zosma11g01120.1           | Liu et al., 2019 |
|                    |                     | ZmaTCP3   | Class II-C | Zosma135g00350.1          | Liu et al., 2019 |
|                    |                     | ZmaTCP4   | Class I    | Zosma20g01250.1           | Liu et al., 2019 |
|                    |                     | ZmaTCP5   | Class II-C | Zosma220g00160.1          | Liu et al., 2019 |
|                    |                     | ZmaTCP6   | Class I    | Zosma27g00610.1           | Liu et al., 2019 |
|                    |                     | ZmaTCP7   | Class II-A | Zosma343g00020.1          | Liu et al., 2019 |
|                    |                     | ZmaTCP8   | Class I    | Zosma34g01230.1           | Liu et al., 2019 |
|                    |                     | ZmaTCP9   | Class II-A | Zosma40g00320.1           | Liu et al., 2019 |
|                    |                     | ZmaTCP10  | Class II-B | Zosma54g00550.1           | Liu et al., 2019 |
|                    |                     | ZmaTCP11  | Class II-A | Zosma78g00060.1           | Liu et al., 2019 |
|                    |                     | ZmaTCP12  | Class I    | Zosma78g00840.1           | Liu et al., 2019 |
|                    |                     | ZmaTCP13  | Class I    | Zosma89g00480.1           | Liu et al., 2019 |
|                    |                     | ZmaTCP14  | Class I    | Zosma99g00440.1           | Liu et al., 2019 |
| <b>Gymnosperms</b> | <i>Amentotaxus</i>  | AargTCP1  | Class II-A | c52001_g1_i1              | NCBI             |
|                    | <i>argotaenia</i>   | AargTCP2  | Class II-A | c47794_g1_i4              | NCBI             |
|                    |                     | AargTCP3  | Class II-C | c46091_g1_i1              | NCBI             |
|                    |                     | AargTCP4  | Class II-B | c54022_g1_i1              | NCBI             |
|                    |                     | AargTCP5  | Class II-B | c53978_g1_i1              | NCBI             |
|                    |                     | AargTCP6  | Class I    | c47631_g2_i1              | NCBI             |
|                    |                     | AargTCP7  | Class I    | c50504_g1_i1              | NCBI             |
|                    |                     | AargTCP8  | Class I    | c49922_g1_i1              | NCBI             |
|                    |                     | AargTCP9  | Class I    | c54811_g2_i1              | NCBI             |
|                    |                     | AargTCP10 | Class I    | c39031_g1_i1              | NCBI             |
|                    |                     | AargTCP11 | Class I    | c44405_g1_i1              | NCBI             |
|                    |                     | AargTCP12 | Class I    | c49698_g1_i1              | NCBI             |
|                    |                     | AargTCP13 | Class I    | c52001_g2_i1              | NCBI             |
|                    |                     | AargTCP14 | Class II-A | c49546_g1_i1              | NCBI             |
|                    | <i>Araucaria</i>    | AcunTCP1  | Class II-A | c29690_g1_i1              | NCBI             |
|                    | <i>cunninghamii</i> | AcunTCP2  | Class II-A | c49829_g1_i1              | NCBI             |
|                    |                     | AcunTCP3  | Class II-A | c49437_g2_i2              | NCBI             |
|                    |                     | AcunTCP4  | Class II-B | c44071_g1_i4              | NCBI             |
|                    |                     | AcunTCP5  | Class II-C | c37936_g1_i2              | NCBI             |
|                    |                     | AcunTCP6  | Class II-B | c45079_g1_i2              | NCBI             |
|                    |                     | AcunTCP7  | Class II-A | c46860_g3_i1              | NCBI             |
|                    |                     | AcunTCP8  | Class I    | c26091_g2_i1+c26091_g1_i1 | NCBI             |
|                    |                     | AcunTCP9  | Class I    | c34516_g1_i1              | NCBI             |
|                    |                     | AcunTCP10 | Class I    | c32880_g1_i1              | NCBI             |
|                    |                     | AcunTCP11 | Class I    | c67610_g1_i1              | NCBI             |
|                    |                     | AcunTCP12 | Class I    | c38744_g1_i1              | NCBI             |
|                    |                     | AcunTCP13 | Class I    | c39062_g2_i1              | NCBI             |
|                    |                     | AcunTCP14 | Class I    | c67941_g1_i1              | NCBI             |

## Supplementary Material

|                                |           |            |              |           |      |
|--------------------------------|-----------|------------|--------------|-----------|------|
|                                | AcunTCP15 | Class I    | c25021_g1_i1 |           | NCBI |
| <i>Cephalotaxus sinensis</i>   | CepTCP1   | Class II-C | c37352_g1_i2 |           | NCBI |
|                                | CepTCP2   | Class II-B | c41306_g1_i4 |           | NCBI |
|                                | CepTCP3   | Class II-A | c41854_g1_i2 |           | NCBI |
|                                | CepTCP4   | Class II-C | c12858_g1_i1 |           | NCBI |
|                                | CepTCP5   | Class II-A | c45353_g1_i5 |           | NCBI |
|                                | CepTCP6   | Class II-A | c41854_g2_i2 |           | NCBI |
|                                | CepTCP7   | Class II-C | c45012_g2_i1 |           | NCBI |
|                                | CepTCP8   | Class I    | c32536_g1_i3 |           | NCBI |
|                                | CepTCP9   | Class I    | c30511_g1_i1 |           | NCBI |
|                                | CepTCP10  | Class I    | c29688_g1_i1 |           | NCBI |
|                                | CepTCP11  | Class I    | c42990_g1_i1 |           | NCBI |
|                                | CepTCP12  | Class I    | c40493_g1_i1 |           | NCBI |
|                                | CepTCP13  | Class I    | c42559_g2_i1 |           | NCBI |
|                                | CepTCP14  | Class I    | c48078_g2_i1 |           | NCBI |
| <i>Cunninghamia lanceolata</i> | ClanTCP1  | Class II-B | c18787_g1_i2 |           | NCBI |
|                                | ClanTCP2  | Class II-A | c33542_g1_i5 |           | NCBI |
|                                | ClanTCP3  | Class II-C | c21837_g1_i2 |           | NCBI |
|                                | ClanTCP4  | Class II-B | c23916_g1_i4 |           | NCBI |
|                                | ClanTCP5  | Class II-C | c25628_g1_i1 |           | NCBI |
|                                | ClanTCP6  | Class I    | c20743_g1_i1 |           | NCBI |
|                                | ClanTCP7  | Class I    | c30598_g1_i1 |           | NCBI |
|                                | ClanTCP8  | Class I    | c31149_g2_i1 |           | NCBI |
|                                | ClanTCP9  | Class I    | c30693_g2_i1 |           | NCBI |
|                                | ClanTCP10 | Class I    | c35304_g4_i1 |           | NCBI |
|                                | ClanTCP11 | Class I    | c32877_g2_i1 |           | NCBI |
|                                | ClanTCP12 | Class I    | c35928_g3_i1 |           | NCBI |
| <i>Cycas panzhihuaensis</i>    | CpaTCP1   | Class II-B | CYCAS_003196 | Dispersed | CNGB |
|                                | CpaTCP2   | Class II-A | CYCAS_003297 | Dispersed | CNGB |
|                                | CpaTCP3   | Class II-A | CYCAS_014483 | Dispersed | CNGB |
|                                | CpaTCP4   | Class II-B | CYCAS_018390 | Dispersed | CNGB |
|                                | CpaTCP5   | Class II-B | CYCAS_018393 | Dispersed | CNGB |
|                                | CpaTCP6   | Class II-A | CYCAS_028954 | Dispersed | CNGB |
|                                | CpaTCP7   | Class II-C | CYCAS_031463 | Tandem    | CNGB |
|                                | CpaTCP8   | Class II-C | CYCAS_031464 | Tandem    | CNGB |
|                                | CpaTCP9   | Class II-C | CYCAS_031466 | Proximal  | CNGB |
|                                | CpaTCP10  | Class II-C | CYCAS_031467 | Singleton | CNGB |
|                                | CpaTCP11  | Class I    | CYCAS_006008 | Proximal  | CNGB |
|                                | CpaTCP12  | Class I    | CYCAS_011180 | Dispersed | CNGB |
|                                | CpaTCP13  | Class I    | CYCAS_024232 | Dispersed | CNGB |
|                                | CpaTCP14  | Class I    | CYCAS_031374 | Dispersed | CNGB |
| <i>Ephedra equisetina</i>      | EpheTCP1  | Class II-A | c33600_g1_i1 |           | NCBI |
|                                | EpheTCP2  | Class II-C | c31519_g1_i1 |           | NCBI |
|                                | EpheTCP3  | Class II-B | c31388_g1_i2 |           | NCBI |
|                                | EpheTCP4  | Class II-B | c15486_g1_i1 |           | NCBI |
|                                | EpheTCP5  | Class I    | c22623_g2_i1 |           | NCBI |



|                  |           |            |                  |           |      |
|------------------|-----------|------------|------------------|-----------|------|
|                  | EpheTCP6  | Class I    | c26283_g1_i1     |           | NCBI |
|                  | EpheTCP7  | Class I    | c22292_g1_i1     |           | NCBI |
|                  | EpheTCP8  | Class I    | c4567_g1_i1      |           | NCBI |
|                  | EpheTCP9  | Class I    | c27029_g1_i1     |           | NCBI |
|                  | EpheTCP10 | Class II-B | c26421_g2_i1     |           | NCBI |
| <i>Fokienia</i>  | FhodTCP1  | Class II-B | c27120_g3_i1     |           | NCBI |
| <i>hodginsii</i> | FhodTCP2  | Class II-C | c5088_g1_i1      |           | NCBI |
|                  | FhodTCP3  | Class II-B | c37902_g1_i1     |           | NCBI |
|                  | FhodTCP4  | Class II-A | c33810_g1_i1     |           | NCBI |
|                  | FhodTCP5  | Class II-A | c37801_g1_i1     |           | NCBI |
|                  | FhodTCP6  | Class II-C | c30205_g1_i2     |           | NCBI |
|                  | FhodTCP7  | Class II-C | c15133_g1_i2     |           | NCBI |
|                  | FhodTCP8  | Class II-A | c22781_g1_i2     |           | NCBI |
|                  | FhodTCP9  | Class I    | c32041_g1_i3     |           | NCBI |
|                  | FhodTCP11 | Class I    | c29773_g1_i1     |           | NCBI |
|                  | FhodTCP12 | Class I    | c38342_g1_i1     |           | NCBI |
|                  | FhodTCP13 | Class I    | c33608_g2_i1     |           | NCBI |
|                  | FhodTCP14 | Class I    | c34576_g1_i1     |           | NCBI |
|                  | FhodTCP15 | Class I    | c22016_g1_i1     |           | NCBI |
|                  | FhodTCP16 | Class I    | c28915_g1_i1     |           | NCBI |
| <i>Ginkgo</i>    | GbiTCP1   | Class II-B | Gb_07891         | Dispersed | NGDC |
| <i>biloba</i>    | GbiTCP2   | Class I    | Gb_17362         | Dispersed | NGDC |
|                  | GbiTCP3   | Class I    | Gb_17445         | Dispersed | NGDC |
|                  | GbiTCP4   | Class II-A | Gb_17863         | Dispersed | NGDC |
|                  | GbiTCP5   | Class II-A | Gb_18221         | Dispersed | NGDC |
|                  | GbiTCP6   | Class I    | Gb_23937/Gb23938 | Dispersed | NGDC |
|                  | GbiTCP7   | Class I    | Gb_24346         | Dispersed | NGDC |
|                  | GbiTCP8   | Class I    | Gb_29528         | Dispersed | NGDC |
|                  | GbiTCP9   | Class I    | Gb_30049         | Proximal  | NGDC |
|                  | GbiTCP10  | Class II-C | Gb_34229         | Dispersed | NGDC |
|                  | GbiTCP11  | Class I    | Gb_35810         | Singleton | NGDC |
|                  | GbiTCP12  | Class II-C | Gb_36354         | Proximal  | NGDC |
|                  | GbiTCP13  | Class II-C | Gb_37187         | Dispersed | NGDC |
|                  | GbiTCP14  | Class II-A | Gb_38376         | Tandem    | NGDC |
|                  | GbiTCP15  | Class II-C | Gb_38377         | Tandem    | NGDC |
|                  | GbiTCP16  | Class II-C | Gb_40698         | Singleton | NGDC |
| <i>Gnetum</i>    | GmmTCP1   | Class I    | TnS000069033t01  |           | NCBI |
| <i>montanum</i>  | GmmTCP2   | Class I    | TnS000090013t03  |           | NCBI |
|                  | GmmTCP3   | Class II-B | TnS000208401t01  |           | NCBI |
|                  | GmmTCP4   | Class II-C | TnS000432977t01  |           | NCBI |
|                  | GmmTCP5   | Class II-C | TnS000432977t04  |           | NCBI |
|                  | GmmTCP6   | Class I    | TnS000473551t05  |           | NCBI |
|                  | GmmTCP7   | Class II-B | TnS000547309t01  |           | NCBI |
|                  | GmmTCP8   | Class II-B | TnS000612329t03  |           | NCBI |
|                  | GmmTCP9   | Class II-C | TnS000831451t03  |           | NCBI |
|                  | GmmTCP10  | Class I    | TnS000845445t02  |           | NCBI |
|                  | GmmTCP11  | Class II-A | TnS000898189t01  |           | NCBI |

## Supplementary Material

|                        |          |            |                  |            |
|------------------------|----------|------------|------------------|------------|
|                        | GmmTCP12 | Class I    | TnS001041269t11  | NCBI       |
| <i>Metasequoia</i>     | MetTCP1  | Class II-A | c52624_g3_i1     | NCBI       |
| <i>glyptostroboide</i> | MetTCP2  | Class II-B | c47777_g1_i3     | NCBI       |
|                        | MetTCP3  | Class II-B | c23714_g1_i1     | NCBI       |
|                        | MetTCP4  | Class II-A | c46846_g1_i2     | NCBI       |
|                        | MetTCP5  | Class II-C | c49302_g1_i1     | NCBI       |
|                        | MetTCP6  | Class II-C | c42213_g1_i3     | NCBI       |
|                        | MetTCP7  | Class II-C | c43902_g1_i1     | NCBI       |
|                        | MetTCP8  | Class I    | c35423_g1_i3     | NCBI       |
|                        | MetTCP9  | Class I    | c38117_g2_i1     | NCBI       |
|                        | MetTCP10 | Class I    | c51920_g1_i1     | NCBI       |
|                        | MetTCP11 | Class I    | c32918_g2_i1     | NCBI       |
|                        | MetTCP12 | Class I    | c57293_g4_i1     | NCBI       |
|                        | MetTCP13 | Class I    | c53306_g1_i1     | NCBI       |
|                        | MetTCP14 | Class I    | c25416_g1_i1     | NCBI       |
| <i>Picea abies</i>     | PabTCP1  | Class II-B | MA_101752g0020   | Plantgenie |
|                        | PabTCP2  | Class I    | MA_102718g0020   | Plantgenie |
|                        | PabTCP3  | Class I    | MA_10318773g0010 | Plantgenie |
|                        | PabTCP4  | Class II-B | MA_10426407g0020 | Plantgenie |
|                        | PabTCP5  | Class II-B | MA_12784g0010    | Plantgenie |
|                        | PabTCP6  | Class II-A | MA_1379g0010     | Plantgenie |
|                        | PabTCP7  | Class II-B | MA_15254g0010    | Plantgenie |
|                        | PabTCP8  | Class II-C | MA_16704g0010    | Plantgenie |
|                        | PabTCP9  | Class I    | MA_16752g0010    | Plantgenie |
|                        | PabTCP10 | Class II-A | MA_178227g0010   | Plantgenie |
|                        | PabTCP11 | Class II-B | MA_189502g0010   | Plantgenie |
|                        | PabTCP12 | Class I    | MA_2101g0010     | Plantgenie |
|                        | PabTCP13 | Class II-C | MA_35349g0010    | Plantgenie |
|                        | PabTCP14 | Class II-B | MA_37369g0010    | Plantgenie |
|                        | PabTCP15 | Class II-B | MA_3891g0010     | Plantgenie |
|                        | PabTCP16 | Class II-B | MA_4774g0010     | Plantgenie |
|                        | PabTCP17 | Class II-A | MA_52440g0010    | Plantgenie |
|                        | PabTCP18 | Class II-B | MA_547683g0010   | Plantgenie |
|                        | PabTCP19 | Class I    | MA_635g0010      | Plantgenie |
|                        | PabTCP20 | Class II-C | MA_75780g0010    | Plantgenie |
|                        | PabTCP21 | Class I    | MA_762628g0010   | Plantgenie |
|                        | PabTCP22 | Class I    | MA_81710g0010    | Plantgenie |
|                        | PabTCP23 | Class II-C | MA_92659g0010    | Plantgenie |
|                        | PabTCP24 | Class II-B | MA_93117g0010    | Plantgenie |
| <i>Pinus</i>           | PilaTCP1 | Class I    | PILA_05950       | TreeGenes  |
| <i>lambertiana</i>     | PilaTCP2 | Class I    | PILA_08502       | TreeGenes  |
|                        | PilaTCP3 | Class I    | PILA_14504       | TreeGenes  |
|                        | PilaTCP4 | Class II-A | PILA_15258       | TreeGenes  |
|                        | PilaTCP6 | Class II-C | PILA_18466       | TreeGenes  |
|                        | PilaTCP7 | Class I    | PILA_23482       | TreeGenes  |
|                        | PilaTCP9 | Class I    | PILA_27825       | TreeGenes  |

|                     |           |            |                       |           |            |
|---------------------|-----------|------------|-----------------------|-----------|------------|
|                     | PilaTCP10 | Class II-B | PILA_28581            |           | TreeGenes  |
|                     | PilaTCP11 | Class I    | PILA_28722            |           | TreeGenes  |
|                     | PilaTCP12 | Class I    | PILA_30758/PILA_16840 |           | TreeGenes  |
|                     | PilaTCP13 | Class II-B | PILA_35774            |           | TreeGenes  |
|                     | PilaTCP14 | Class II-A | PILA_36259            |           | TreeGenes  |
|                     | PilaTCP15 | Class II-C | PILA_37973            |           | TreeGenes  |
|                     | PilaTCP16 | Class I    | PILA_37998            |           | TreeGenes  |
| <i>Pinus</i>        | PtaTCP1   | Class II-A | Pt0G22490.1           | Dispersed | CNGB       |
| <i>tabuliformis</i> | PtaTCP2   | Class II-A | Pt0G35910.1           | Dispersed | CNGB       |
|                     | PtaTCP3   | Class II-A | Pt2G12530.1           | Dispersed | CNGB       |
|                     | PtaTCP4   | Class II-C | Pt2G34160.1           | Proximal  | CNGB       |
|                     | PtaTCP5   | Class II-C | Pt2G34180.1           | Proximal  | CNGB       |
|                     | PtaTCP6   | Class II-A | Pt3G48910.1           | Dispersed | CNGB       |
|                     | PtaTCP7   | Class II-A | Pt4G23150.1           | Dispersed | CNGB       |
|                     | PtaTCP8   | Class II-C | Pt5G21260.1           | Proximal  | CNGB       |
|                     | PtaTCP9   | Class II-C | Pt5G21330.1           | Proximal  | CNGB       |
|                     | PtaTCP10  | Class II-A | Pt5G59850.1           | Proximal  | CNGB       |
|                     | PtaTCP11  | Class II-B | Pt6G43400.1           | Proximal  | CNGB       |
|                     | PtaTCP12  | Class II-B | Pt6G43440.1           | Proximal  | CNGB       |
|                     | PtaTCP13  | Class II-B | Pt6G43460.1           | Proximal  | CNGB       |
|                     | PtaTCP14  | Class II-B | Pt6G43480.1           | Tandem    | CNGB       |
|                     | PtaTCP15  | Class II-B | Pt6G43490.1           | Tandem    | CNGB       |
|                     | PtaTCP16  | Class II-A | Pt9G27160.1           | Dispersed | CNGB       |
|                     | PtaTCP17  | Class II-B | PtJG17690.1           | Dispersed | CNGB       |
|                     | PtaTCP18  | Class II-A | PtJG45360.1           | Dispersed | CNGB       |
|                     | PtaTCP19  | Class II-A | PtXG28290.1           | Dispersed | CNGB       |
|                     | PtaTCP20  | Class II-A | PtXG33310.1           | Proximal  | CNGB       |
|                     | PtaTCP21  | Class I    | Pt1G10100.1           | Dispersed | CNGB       |
|                     | PtaTCP22  | Class I    | Pt1G79940.1           | Dispersed | CNGB       |
|                     | PtaTCP23  | Class I    | Pt5G24770.1           | Dispersed | CNGB       |
|                     | PtaTCP24  | Class I    | Pt6G34430.1           | Dispersed | CNGB       |
|                     | PtaTCP25  | Class I    | Pt9G18760.1           | Dispersed | CNGB       |
|                     | PtaTCP26  | Class I    | Pt9G43570.1           | Dispersed | CNGB       |
|                     | PtaTCP27  | Class I    | PtQG06090.1           | Dispersed | CNGB       |
|                     | PtaTCP28  | Class I    | PtQG11760.1           | Dispersed | CNGB       |
|                     | PtaTCP29  | Class I    | PtXG25900.1           | Dispersed | CNGB       |
| <i>Pinus taeda</i>  | PitaTCP1  | Class II-B | PITA_09530            |           | Plantgenie |
|                     | PitaTCP2  | Class II-B | PITA_12692            |           | Plantgenie |
|                     | PitaTCP3  | Class II-B | PITA_15014            |           | Plantgenie |
|                     | PitaTCP4  | Class II-B | PITA_15274            |           | Plantgenie |
|                     | PitaTCP5  | Class II-B | PITA_17789            |           | Plantgenie |
|                     | PitaTCP6  | Class I    | PITA_21443            |           | Plantgenie |
|                     | PitaTCP7  | Class II-B | PITA_24959            |           | Plantgenie |
|                     | PitaTCP8  | Class I    | PITA_25541            |           | Plantgenie |
|                     | PitaTCP9  | Class I    | PITA_25700            |           | Plantgenie |
|                     | PitaTCP10 | Class I    | PITA_27053            |           | Plantgenie |
|                     | PitaTCP12 | Class II-C | PITA_35734            |           | Plantgenie |

## Supplementary Material

|                     |           |            |              |            |
|---------------------|-----------|------------|--------------|------------|
|                     | PitaTCP13 | Class I    | PITA_39176   | Plantgenie |
|                     | PitaTCP14 | Class I    | PITA_41031   | Plantgenie |
|                     | PitaTCP15 | Class II-B | PITA_44314   | Plantgenie |
| <i>Platycladus</i>  | PoriTCP1  | Class II-B | c36370_g2_i2 | NCBI       |
| <i>orientalis</i>   | PoriTCP2  | Class II-C | c22612_g1_i1 | NCBI       |
|                     | PoriTCP3  | Class II-B | c35100_g1_i3 | NCBI       |
|                     | PoriTCP4  | Class II-A | c36183_g1_i2 | NCBI       |
|                     | PoriTCP5  | Class II-C | c34278_g2_i2 | NCBI       |
|                     | PoriTCP6  | Class II-A | c41744_g1_i3 | NCBI       |
|                     | PoriTCP7  | Class I    | c21343_g1_i1 | NCBI       |
|                     | PoriTCP9  | Class I    | c19682_g1_i1 | NCBI       |
|                     | PoriTCP10 | Class I    | c29412_g1_i1 | NCBI       |
|                     | PoriTCP11 | Class I    | c38499_g2_i2 | NCBI       |
|                     | PoriTCP12 | Class I    | c19045_g2_i1 | NCBI       |
|                     | PoriTCP13 | Class I    | c36485_g1_i2 | NCBI       |
|                     | PoriTCP14 | Class I    | c39429_g1_i1 | NCBI       |
| <i>Podocarpus</i>   | PmacTCP1  | Class II-B | c37936_g1_i1 | NCBI       |
| <i>macrophyllus</i> | PmacTCP2  | Class II-B | c36042_g1_i1 | NCBI       |
|                     | PmacTCP3  | Class II-A | c49163_g1_i3 | NCBI       |
|                     | PmacTCP4  | Class II-C | c19462_g1_i1 | NCBI       |
|                     | PmacTCP5  | Class II-A | c56893_g1_i1 | NCBI       |
|                     | PmacTCP6  | Class II-C | c27773_g2_i1 | NCBI       |
|                     | PmacTCP7  | Class I    | c50325_g1_i2 | NCBI       |
|                     | PmacTCP8  | Class I    | c31622_g1_i1 | NCBI       |
|                     | PmacTCP9  | Class I    | c37195_g1_i1 | NCBI       |
|                     | PmacTCP10 | Class I    | c47447_g1_i1 | NCBI       |
|                     | PmacTCP11 | Class I    | c1092_g1_i1  | NCBI       |
|                     | PmacTCP12 | Class I    | c48019_g3_i1 | NCBI       |
|                     | PmacTCP13 | Class I    | c4969_g1_i1  | NCBI       |
|                     | PmacTCP14 | Class I    | c41439_g1_i1 | NCBI       |
| <i>Pseudotaxus</i>  | PchiTCP1  | Class II-B | c48609_g1_i1 | NCBI       |
| <i>chienii</i>      | PchiTCP2  | Class II-A | c46127_g1_i5 | NCBI       |
|                     | PchiTCP3  | Class I    | c25835_g2_i1 | NCBI       |
|                     | PchiTCP4  | Class I    | c36731_g3_i1 | NCBI       |
|                     | PchiTCP5  | Class I    | c44338_g1_i1 | NCBI       |
|                     | PchiTCP6  | Class I    | c18850_g1_i1 | NCBI       |
|                     | PchiTCP7  | Class I    | c47354_g1_i1 | NCBI       |
|                     | PchiTCP8  | Class I    | c50182_g1_i1 | NCBI       |
|                     | PchiTCP9  | Class I    | c31824_g1_i1 | NCBI       |
| <i>Pseudotsuga</i>  | PsmeTCP1  | Class II-A | PSME_00771   | TreeGenes  |
| <i>menziesii</i>    | PsmeTCP2  | Class II-B | PSME_01457   | TreeGenes  |
|                     | PsmeTCP3  | Class I    | PSME_11161   | TreeGenes  |
|                     | PsmeTCP4  | Class I    | PSME_11162   | TreeGenes  |
|                     | PsmeTCP5  | Class I    | PSME_12280   | TreeGenes  |
|                     | PsmeTCP6  | Class I    | PSME_12667   | TreeGenes  |
|                     | PsmeTCP7  | Class II-B | PSME_14975   | TreeGenes  |

|                     |           |            |                         |           |
|---------------------|-----------|------------|-------------------------|-----------|
|                     | PsmcTCP8  | Class II-B | PSME_17261              | TreeGenes |
|                     | PsmcTCP9  | Class II-B | PSME_18749              | TreeGenes |
|                     | PsmcTCP10 | Class II-B | PSME_20418              | TreeGenes |
|                     | PsmcTCP11 | Class I    | PSME_22519              | TreeGenes |
|                     | PsmcTCP12 | Class I    | PSME_25171              | TreeGenes |
|                     | PsmcTCP13 | Class I    | PSME_26507              | TreeGenes |
|                     | PsmcTCP14 | Class I    | PSME_27453              | TreeGenes |
|                     | PsmcTCP15 | Class II-C | PSME_33238              | TreeGenes |
|                     | PsmcTCP16 | Class I    | PSME_37590              | TreeGenes |
|                     | PsmcTCP17 | Class I    | PSME_41354              | TreeGenes |
| <i>Sciadopitys</i>  | SverTCP1  | Class II-A | c38858_g3_i2            | NCBI      |
| <i>verticillata</i> | SverTCP2  | Class II-C | c22687_g1_i1            | NCBI      |
|                     | SverTCP3  | Class II-B | c30217_g2_i1            | NCBI      |
|                     | SverTCP4  | Class II-A | c36485_g1_i1            | NCBI      |
|                     | SverTCP5  | Class II-B | c35001_g2_i2            | NCBI      |
|                     | SverTCP6  | Class I    | c30211_g1_i1            | NCBI      |
|                     | SverTCP7  | Class I    | c30831_g3_i1            | NCBI      |
|                     | SverTCP8  | Class I    | c33850_g1_i1            | NCBI      |
|                     | SverTCP9  | Class I    | c34460_g1_i2            | NCBI      |
|                     | SverTCP10 | Class I    | c41998_g1_i1            | NCBI      |
|                     | SverTCP11 | Class I    | c26081_g1_i1            | NCBI      |
|                     | SverTCP12 | Class I    | c30831_g1_i1            | NCBI      |
| <i>Taxus</i>        | TwaTCP1   | Class I    | hds144570.1             | CNGB      |
| <i>wallichiana</i>  | TwaTCP2   | Class I    | hds269320.1             | CNGB      |
|                     | TwaTCP3   | Class I    | hds311110.1             | CNGB      |
|                     | TwaTCP4   | Class I    | hds359070.1             | CNGB      |
|                     | TwaTCP5   | Class I    | hds365250.1             | CNGB      |
|                     | TwaTCP6   | Class I    | hds426070.1             | CNGB      |
|                     | TwaTCP7   | Class II-A | hds015070.1             | CNGB      |
|                     | TwaTCP8   | Class II-A | hds027250.1             | CNGB      |
|                     | TwaTCP9   | Class II-C | hds080660.1             | CNGB      |
|                     | TwaTCP10  | Class II-C | hds080680.1             | CNGB      |
|                     | TwaTCP11  | Class II-A | hds158840.1             | CNGB      |
|                     | TwaTCP12  | Class II-A | hds106850.1             | CNGB      |
|                     | TwaTCP13  | Class II-C | hds183860.1             | CNGB      |
|                     | TwaTCP14  | Class II-B | hds207430.1             | CNGB      |
|                     | TwaTCP15  | Class II-A | hds273290.1             | CNGB      |
|                     | TwaTCP16  | Class II-A | hds273310.1             | CNGB      |
|                     | TwaTCP17  | Class II-A | hds273340.1             | CNGB      |
|                     | TwaTCP18  | Class II-C | hds385570.1             | CNGB      |
|                     | TwaTCP19  | Class II-C | hds385590.1             | CNGB      |
|                     | TwaTCP20  | Class II-C | hds385640.1             | CNGB      |
|                     | TwaTCP21  | Class II-C | hds385660.1             | CNGB      |
|                     | TwaTCP22  | Class II-C | hds003850.1;hds003870.1 | CNGB      |
|                     | TwaTCP23  | Class II-C | hds003910.1;hds003880.1 | CNGB      |
|                     | TwaTCP24  | Class II-C | hds003890.1;hds281420.1 | CNGB      |
| <i>Torreya</i>      | TjacTCP1  | Class II-A | c24266_g1_i3            | NCBI      |

## Supplementary Material

|              |                            |           |                               |                 |                  |              |
|--------------|----------------------------|-----------|-------------------------------|-----------------|------------------|--------------|
|              | <i>jackii</i>              | TjacTCP2  | Class II-C                    | c25126_g2_i1    |                  | NCBI         |
|              |                            | TjacTCP3  | Class II-C                    | c10183_g1_i1    |                  | NCBI         |
|              |                            | TjacTCP4  | Class II-B                    | c27877_g1_i1    |                  | NCBI         |
|              |                            | TjacTCP5  | Class II-B                    | c19997_g1_i2    |                  | NCBI         |
|              |                            | TjacTCP6  | Class I                       | c14736_g1_i2    |                  | NCBI         |
|              |                            | TjacTCP7  | Class I                       | c38557_g1_i1    |                  | NCBI         |
|              |                            | TjacTCP8  | Class I                       | c21900_g1_i1    |                  | NCBI         |
|              |                            | TjacTCP9  | Class I                       | c27464_g1_i1    |                  | NCBI         |
|              |                            | TjacTCP10 | Class I                       | c18116_g1_i1    |                  | NCBI         |
|              |                            | TjacTCP11 | Class I                       | c22530_g1_i1    |                  | NCBI         |
|              |                            | TjacTCP12 | Class I                       | c17612_g1_i1    |                  | NCBI         |
|              |                            | TjacTCP13 | Class I                       | c21983_g3_i1    |                  | NCBI         |
|              |                            |           | <i>Welwitschia_ mirabilis</i> | WelTCP1         | Class II-B       | c40719_g1_i1 |
| WelTCP2      | Class II-A                 |           |                               | c8385_g1_i1     |                  | CNGB         |
| WelTCP3      | Class II-B                 |           |                               | c22268_g1_i1    |                  | CNGB         |
| WelTCP4      | Class II-B                 |           |                               | c23049_g1_i1    |                  | CNGB         |
| WelTCP5      | Class I                    |           |                               | c13671_g1_i1    |                  | CNGB         |
| WelTCP6      | Class I                    |           |                               | c72434_g1_i1    |                  | CNGB         |
| WelTCP7      | Class I                    |           |                               | c58966_g1_i1    |                  | CNGB         |
| WelTCP8      | Class I                    |           |                               | c11489_g1_i1    |                  | CNGB         |
| WelTCP9      | Class I                    |           |                               | c39483_g1_i1    |                  | CNGB         |
| WelTCP10     | Class I                    |           |                               | c22523_g1_i1    |                  | CNGB         |
| WelTCP11     | Class I                    |           |                               | c25348_g1_i1    |                  | CNGB         |
| WelTCP12     | Class I                    |           |                               | c55375_g1_i1    |                  | CNGB         |
| WelTCP13     | Class I                    |           |                               | c33069_g1_i1    |                  | CNGB         |
|              | <i>Zamia furfuracea</i>    | ZfuTCP1   | Class II-B                    | c31650_g2_i1    |                  | NCBI         |
|              |                            | ZfuTCP2   | Class II-B                    | c23506_g1_i2    |                  | NCBI         |
|              |                            | ZfuTCP3   | Class II-A                    | c5463_g1_i1     |                  | NCBI         |
|              |                            | ZfuTCP4   | Class II-A                    | c29260_g2_i1    |                  | NCBI         |
|              |                            | ZfuTCP5   | Class I                       | c20974_g2_i1    |                  | NCBI         |
|              |                            | ZfuTCP6   | Class I                       | c34827_g1_i1    |                  | NCBI         |
|              |                            | ZfuTCP7   | Class I                       | c21778_g1_i1    |                  | NCBI         |
|              |                            | ZfuTCP8   | Class I                       | c27963_g2_i1    |                  | NCBI         |
|              |                            | ZfuTCP9   | Class I                       | c30473_g1_i2    |                  | NCBI         |
| <b>Ferns</b> | <i>Adiantum caudatum</i>   | AcauTCP1  | Class I                       | c20559_g1_i1    |                  | NCBI         |
|              |                            | AcauTCP2  | Class I                       | c27163_g1_i1    |                  | NCBI         |
|              |                            | AcauTCP3  | Class I                       | c25461_g1_i1    |                  | NCBI         |
|              |                            | AcauTCP4  | Class II-A                    | c23707_g1_i1    |                  | NCBI         |
|              |                            | AcauTCP5  | Class II-A                    | c26134_g1_i1    |                  | NCBI         |
|              |                            | AcauTCP6  | Class II-A                    | c26719_g1_i1    |                  | NCBI         |
|              |                            | AcauTCP7  | Class II-A                    | c26719_g2_i1    |                  | NCBI         |
|              | <i>Alsophila spinulosa</i> | AspTCP1   | Class I                       | Aspi01Gene03180 | WGD or Segmental | figshare     |
|              |                            | AspTCP2   | Class I                       | Aspi01Gene05022 | Dispersed        | figshare     |
|              |                            | AspTCP3   | Class I                       | Aspi01Gene05356 | Dispersed        | figshare     |
|              |                            | AspTCP4   | Class I                       | Aspi01Gene06134 | WGD or Segmental | figshare     |
|              |                            | AspTCP5   | Class I                       | Aspi01Gene42326 | WGD or Segmental | figshare     |

|                     |           |            |                    |                  |          |
|---------------------|-----------|------------|--------------------|------------------|----------|
|                     | AspTCP6   | Class I    | Aspi01Gene42669    | Dispersed        | figshare |
|                     | AspTCP7   | Class I    | Aspi01Gene43392    | Dispersed        | figshare |
|                     | AspTCP8   | Class I    | Aspi01Gene45519    | Dispersed        | figshare |
|                     | AspTCP9   | Class I    | Aspi01Gene52526    | Dispersed        | figshare |
|                     | AspTCP10  | Class I    | Aspi01Gene53912    | WGD or Segmental | figshare |
|                     | AspTCP11  | Class I    | Aspi01Gene54856    | WGD or Segmental | figshare |
|                     | AspTCP12  | Class I    | Aspi01Gene56690    | Dispersed        | figshare |
|                     | AspTCP13  | Class I    | Aspi01Gene61342    | Dispersed        | figshare |
|                     | AspTCP14  | Class I    | Aspi01Gene65051    | Dispersed        | figshare |
|                     | AspTCP15  | Class I    | Aspi01Gene72040    | WGD or Segmental | figshare |
|                     | AspTCP16  | Class II-A | Aspi01Gene02912    | WGD or Segmental | figshare |
|                     | AspTCP17  | Class II-A | Aspi01Gene02916    | Proximal         | figshare |
|                     | AspTCP18  | Class II-A | Aspi01Gene02917    | Proximal         | figshare |
|                     | AspTCP19  | Class II-A | Aspi01Gene02918    | Proximal         | figshare |
|                     | AspTCP20  | Class II-A | Aspi01Gene15466    | Dispersed        | figshare |
|                     | AspTCP21  | Class II-A | Aspi01Gene21942    | Dispersed        | figshare |
|                     | AspTCP22  | Class II-A | Aspi01Gene27741    | Dispersed        | figshare |
|                     | AspTCP23  | Class II-A | Aspi01Gene48962    | Dispersed        | figshare |
|                     | AspTCP24  | Class II-A | Aspi01Gene50266    | WGD or Segmental | figshare |
|                     | AspTCP25  | Class II-A | Aspi01Gene52180    | Dispersed        | figshare |
|                     | AspTCP26  | Class II-A | Aspi01Gene55158    | WGD or Segmental | figshare |
|                     | AspTCP27  | Class II-A | Aspi01Gene55173    | WGD or Segmental | figshare |
|                     | AspTCP28  | Class II-A | Aspi01Gene55175    | Tandem           | figshare |
|                     | AspTCP29  | Class II-A | Aspi01Gene55176    | Tandem           | figshare |
|                     | AspTCP30  | Class II-A | Aspi01Gene61163    | Dispersed        | figshare |
|                     | AspTCP31  | Class II-A | Aspi01Gene62817    | WGD or Segmental | figshare |
|                     | AspTCP32  | Class II-A | Aspi01Gene64947    | Dispersed        | figshare |
| <i>Azolla</i>       | AzfiTCP1  | Class I    | Azfi_s0013.g013244 |                  | Fernbase |
| <i>filiculoides</i> | AzfiTCP2  | Class I    | Azfi_s0006.g010337 |                  | Fernbase |
|                     | AzfiTCP3  | Class I    | Azfi_s0271.g061235 |                  | Fernbase |
|                     | AzfiTCP4  | Class I    | Azfi_s0049.g030896 |                  | Fernbase |
|                     | AzfiTCP5  | Class I    | Azfi_s0060.g034817 |                  | Fernbase |
|                     | AzfiTCP6  | Class I    | Azfi_s0090.g042743 |                  | Fernbase |
|                     | AzfiTCP7  | Class II-A | Azfi_s0003.g007839 |                  | Fernbase |
|                     | AzfiTCP8  | Class II-A | Azfi_s0538.g076302 |                  | Fernbase |
|                     | AzfiTCP9  | Class II-A | Azfi_s0168.g054602 |                  | Fernbase |
|                     | AzfiTCP10 | Class II-A | Azfi_s0010.g012107 |                  | Fernbase |
| <i>Ceratopteris</i> | CerTCP1   | Class I    | c31330_g1_i2       |                  | NCBI     |
| <i>richardii</i>    | CerTCP2   | Class I    | c14454_g1_i1       |                  | NCBI     |
|                     | CerTCP3   | Class I    | c8785_g1_i1        |                  | NCBI     |
|                     | CerTCP4   | Class I    | c36204_g1_i1       |                  | NCBI     |
|                     | CerTCP5   | Class I    | c22730_g1_i3       |                  | NCBI     |
|                     | CerTCP6   | Class II-A | c44533_g1_i1       |                  | NCBI     |
| <i>Equisetum</i>    | EdifTCP1  | Class I    | c43032_g1_i1       |                  | NCBI     |
| <i>diffusum</i>     | EdifTCP2  | Class I    | c35982_g2_i1       |                  | NCBI     |
|                     | EdifTCP3  | Class I    | c28619_g1_i1       |                  | NCBI     |
|                     | EdifTCP4  | Class I    | c27342_g1_i1       |                  | NCBI     |

## Supplementary Material

|                   |                       |          |            |                            |                  |
|-------------------|-----------------------|----------|------------|----------------------------|------------------|
|                   |                       | EdifTCP5 | Class I    | c19803_g1_i2               | NCBI             |
|                   |                       | EdifTCP6 | Class I    | c34719_g1_i2               | NCBI             |
|                   |                       | EdifTCP7 | Class II-A | c21281_g1_i1               | NCBI             |
|                   |                       | EdifTCP8 | Class II-A | c45960_g1_i1               | NCBI             |
|                   | <i>Lygodium</i>       | LygTCP1  | Class I    | c49914_g1_i1               | NCBI             |
|                   | <i>flexuosum</i>      | LygTCP2  | Class I    | c30145_g1_i1               | NCBI             |
|                   |                       | LygTCP3  | Class I    | c18073_g1_i1               | NCBI             |
|                   |                       | LygTCP4  | Class I    | c68230_g1_i1               | NCBI             |
|                   | <i>Pteridium</i>      | PterTCP1 | Class I    | c48935_g1_i1               | NCBI             |
|                   | <i>aquilinum</i>      | PterTCP2 | Class I    | c48660_g1_i4               | NCBI             |
|                   |                       | PterTCP3 | Class I    | c56354_g1_i1               | NCBI             |
|                   |                       | PterTCP4 | Class I    | c43790_g1_i1               | NCBI             |
|                   |                       | PterTCP5 | Class I    | c20016_g1_i1               | NCBI             |
|                   |                       | PterTCP6 | Class II-A | c64838_g1_i4               | NCBI             |
|                   | <i>Salvinia</i>       | SacuTCP1 | Class I    | Sacu_v1.1_s0044.g013125    | Fernbase         |
|                   | <i>cucullata</i>      | SacuTCP2 | Class I    | Sacu_v1.1_s0069.g016510    | Fernbase         |
|                   |                       | SacuTCP3 | Class I    | Sacu_v1.1_s0073.g017047    | Fernbase         |
|                   |                       | SacuTCP4 | Class I    | Sacu_v1.1_s0175.g024570    | Fernbase         |
|                   |                       | SacuTCP5 | Class I    | Sacu_v1.1_s0068_cds        | Fernbase         |
|                   |                       | SacuTCP6 | Class II-A | Sacu_v1.1_s0168.g024243    | Fernbase         |
|                   |                       | SacuTCP7 | Class II-A | Sacu_v1.1_s0012_cds        | Fernbase         |
| <b>Lycophytes</b> | <i>Isoetes</i>        | IengTCP1 | Class I    | JAANSK010026223.1          | NCBI             |
|                   | <i>engelmannii</i>    | IengTCP2 | Class I    | JAANSK010001084.1          | NCBI             |
|                   |                       | IengTCP3 | Class I    | JAANSK010001178.1          | NCBI             |
|                   |                       | IengTCP4 | Class II-A | JAANSK010006223.1          | NCBI             |
|                   |                       | IengTCP5 | Class II-A | JAANSK010016223.1          | NCBI             |
|                   |                       | IengTCP6 | Class II-A | JAANSK010000263.1          | Liu et al., 2019 |
|                   | <i>Selaginella</i>    | SmTCP1   | Class II-A | 28794                      | Liu et al., 2019 |
|                   | <i>moellendorffii</i> | SmTCP2   | Class II-A | 29162                      | Liu et al., 2019 |
|                   |                       | SmTCP3   | Class I    | 404061/438214              | Liu et al., 2019 |
|                   |                       | SmTCP4   | Class I    | scaffold_45:798620..798841 | Liu et al., 2019 |
|                   |                       | SmTCP5   | Class I    | 441321                     | Liu et al., 2019 |
|                   |                       | SmTCP6   | Class II-A | 89227                      | Liu et al., 2019 |
| <b>Bryophytes</b> | <i>Anthoceros</i>     | AnagTCP1 | Class I    | VJWM01000108.1             | NCBI             |
|                   | <i>angustus</i>       | AnagTCP2 | Class II-A | VJWM01000192.1             | NCBI             |
|                   | <i>Marchantia</i>     | MpTCP1   | Class II-A | Mapoly0001s0298.1.p        | Liu et al., 2019 |
|                   | <i>polymorpha</i>     | MpTCP2   | Class I    | Mapoly0068s0102.1.p        | Liu et al., 2019 |
|                   | <i>Physcomitrella</i> | PpTCP1   | Class I    | Pp3c10_14310V3.1.p         | Liu et al., 2019 |
|                   | <i>patens</i>         | PpTCP2   | Class I    | Pp3c10_20400V3.1.p         | Liu et al., 2019 |
|                   |                       | PpTCP3   | Class II-A | Pp3c11_26670V3.1.p         | Liu et al., 2019 |
|                   |                       | PpTCP4   | Class I    | Pp3c3_24450V3.1.p          | Liu et al., 2019 |
|                   |                       | PpTCP5   | Class I    | Pp3c3_24660V3.1.p          | Liu et al., 2019 |
|                   |                       | PpTCP7   | Class II-A | Pp3c7_5230V3.2.p           | Liu et al., 2019 |
|                   | <i>Sphagnum</i>       | SfaTCP1  | Class I    | Sphfalx0001s0381.1.p       | Liu et al., 2019 |
|                   | <i>fallax</i>         | SfaTCP2  | Class I    | Sphfalx0023s0122.1.p       | Liu et al., 2019 |
|                   |                       | SfaTCP3  | Class I    | Sphfalx0067s0096.1.p       | Liu et al., 2019 |



|       |                       |          |            |                      |                  |
|-------|-----------------------|----------|------------|----------------------|------------------|
|       |                       | SfaTCP4  | Class I    | Sphfalx0188s0014.1.p | Liu et al., 2019 |
|       |                       | SfaTCP5  | Class I    | Sphfalx0231s0014.1.p | Liu et al., 2019 |
| Algae | <i>Mesotaenium</i>    | MendTCP1 | Class I    | ME000298S05127/S298  | figshare         |
|       | <i>endlicherianum</i> | MendTCP2 | Class II-A | S210                 | figshare         |
|       | <i>Spirogloea</i>     | SmusTCP1 | Class I    | SM000060S19623/s60   | figshare         |
|       | <i>musicola</i>       | SmusTCP2 | Class I    | SM003533S13204/s3533 | figshare         |
|       |                       | SmusTCP3 | Class I    | SM000037S13520/s37   | figshare         |
|       |                       | SmusTCP4 | Class II   | s63                  | figshare         |
|       |                       | SmusTCP5 | Class II   | s398                 | figshare         |
|       |                       | SmusTCP6 | Class II   | s177                 | figshare         |

\*Database websites: CNGB, <https://db.cngb.org/>; Fernbase, <https://www.fernbase.org/>; figshare, <https://figshare.com>; NCBI, <https://www.ncbi.nlm.nih.gov/>; NGDC, <https://ngdc.cncb.ac.cn/>; Phytozome, <http://phytozome.jgi.doe.gov/>; Plantgenie, <https://plantgenie.org/>; TreeGenes, <https://treegenesdb.org/>.

## REFERENCES

Liu, M. M., Wang, M. M., Yang, J., Wen, J., Guo, P. C., Wu, Y. W., et al. (2019). Evolutionary and comparative expression analyses of TCP transcription factor gene family in land plants. *Int. J. Mol. Sci.* 20, 3591. doi: 10.3390/ijms20143591
