# Supplementary material for: Comprehensive evolutionary analysis of the TCP gene family: Further insights for its origin, expansion, and diversification
Source: PubMed Central journal article supplement (PMC9480096; doi:10.3389/fpls.2022.994567), 2022-09-02

Supplementary Figure 1

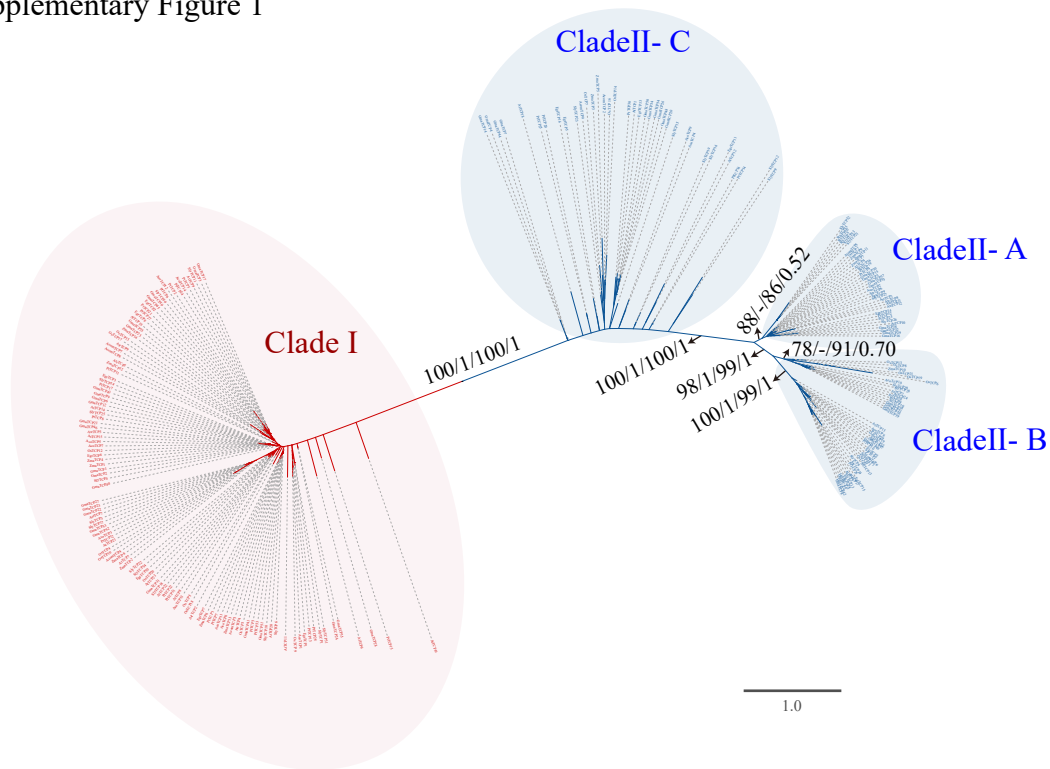

Supplementary Figure 2

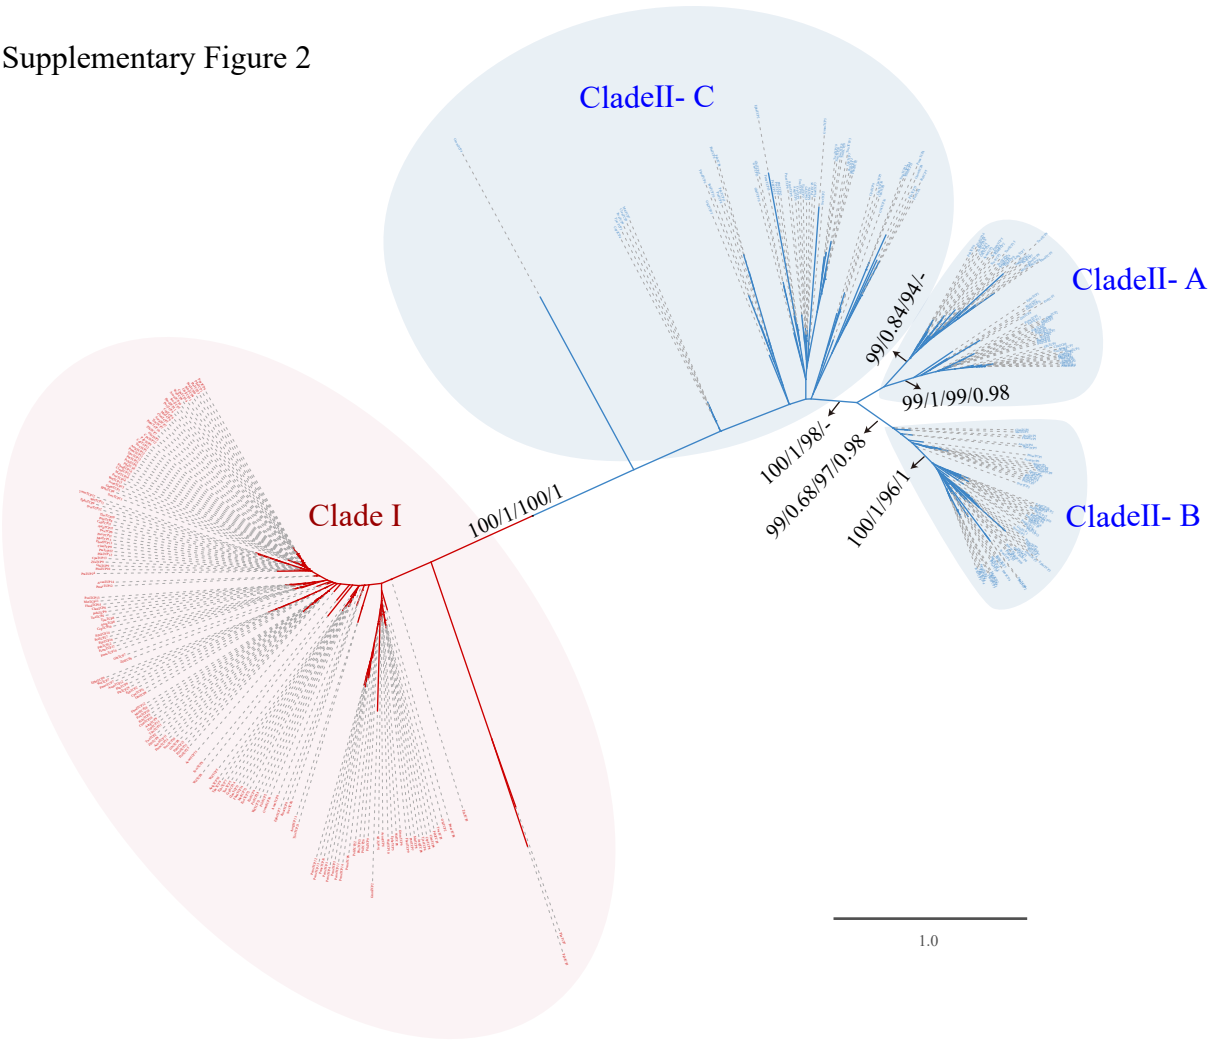

# Supplementary Figure 3

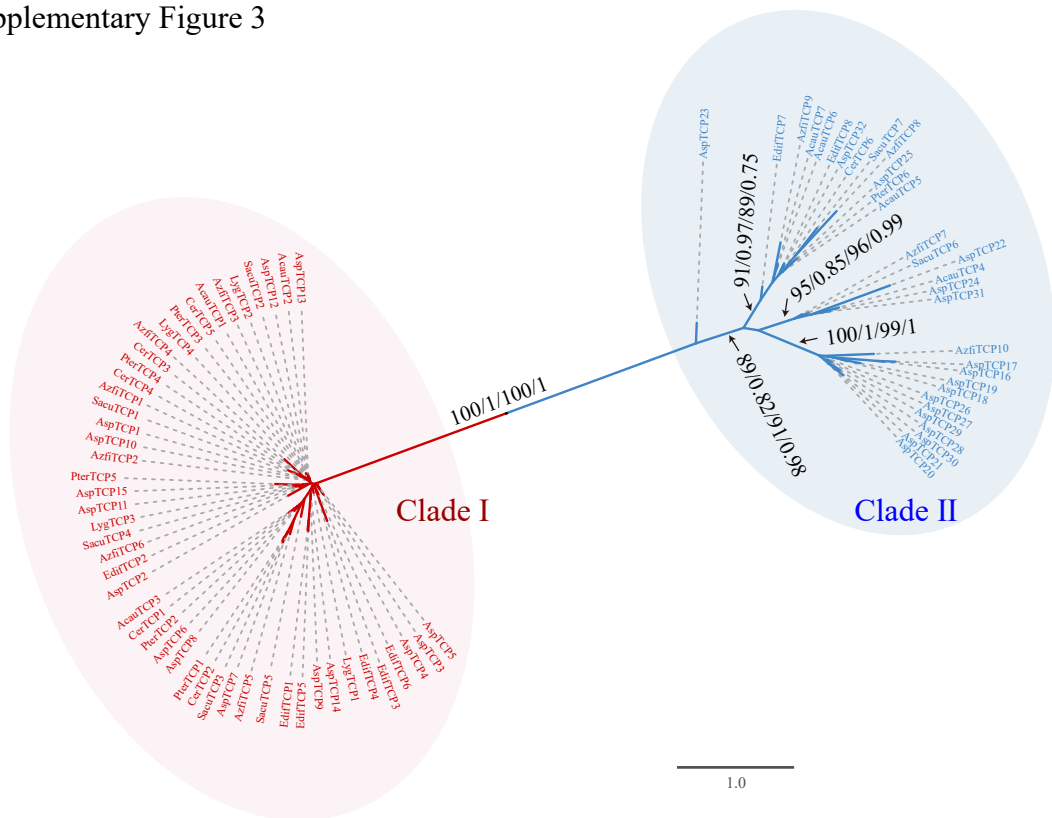

Supplementary Figure 4

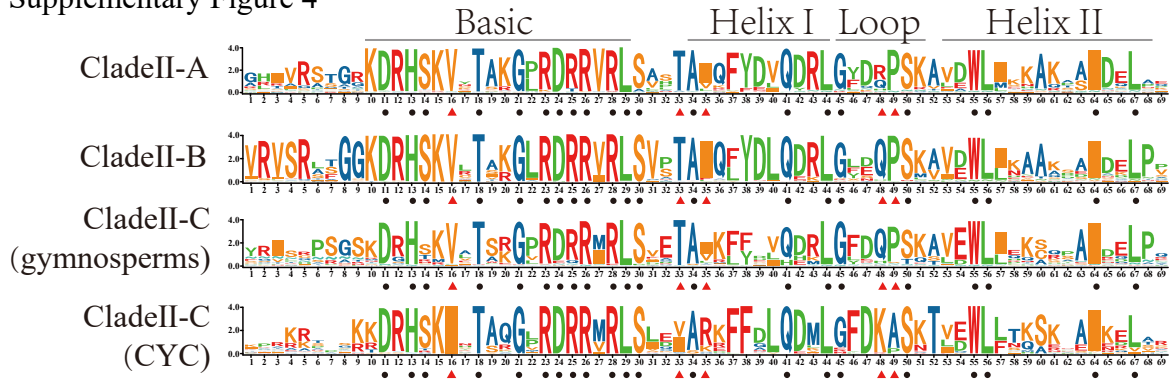

# Supplementary Figure 5

(A)

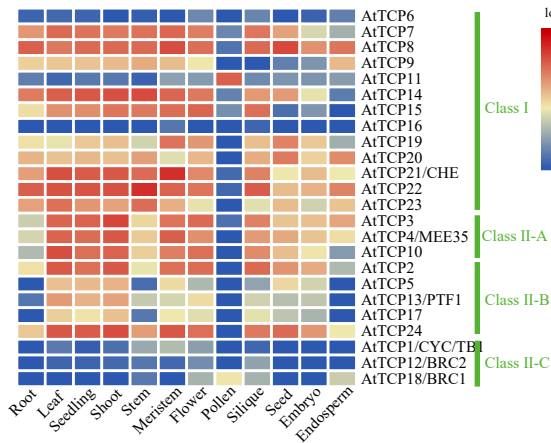

(B)

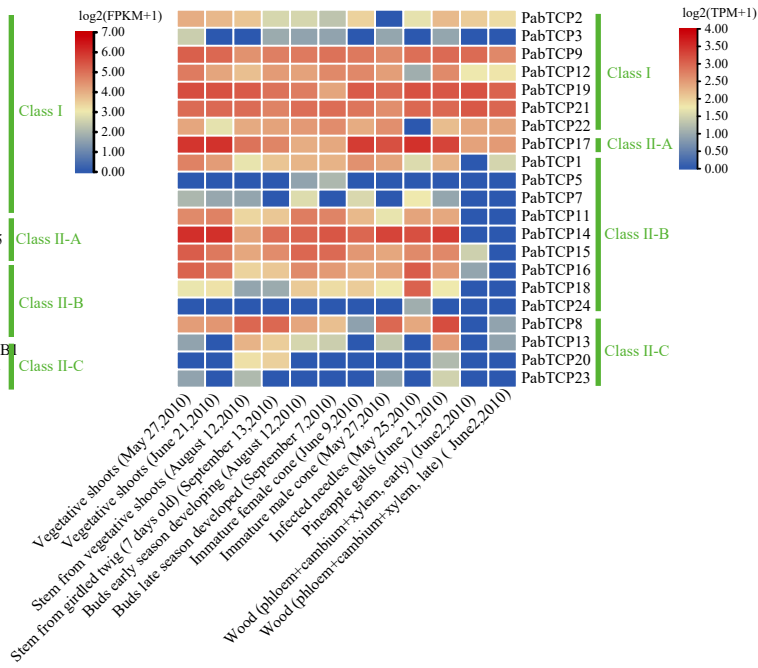

Supplement: Data_Sheet_2.pdf [file Data_Sheet_2.pdf]
